# Supplementary material for: Reciprocal co-regulation of EGR2 and MECP2 is disrupted in Rett syndrome and autism
Source: PubMed Central journal article supplement — Hum Mol Genet. 2008 Nov 10;18(3):525–34. doi: 10.1093/hmg/ddn380 (PMC2638799; doi:10.1093/hmg/ddn380), 2008-11-10
Supplement: ddn380_1.pdf [file ddn380_1.pdf]

Supplementary Figure 1. Potential MeCP2 binding sites were identified in the *EGR2* intron by: a. Identifying Matrix Attachment Regions (MARS) using MAR-Wiz (Futuresoft at <http://www.futuresoft.org/MAR-Wiz>) b. Identifying CpGs located near A/T runs within a high-scoring MAR. CHIP showed MeCP2 binding within the amplicon in brackets.

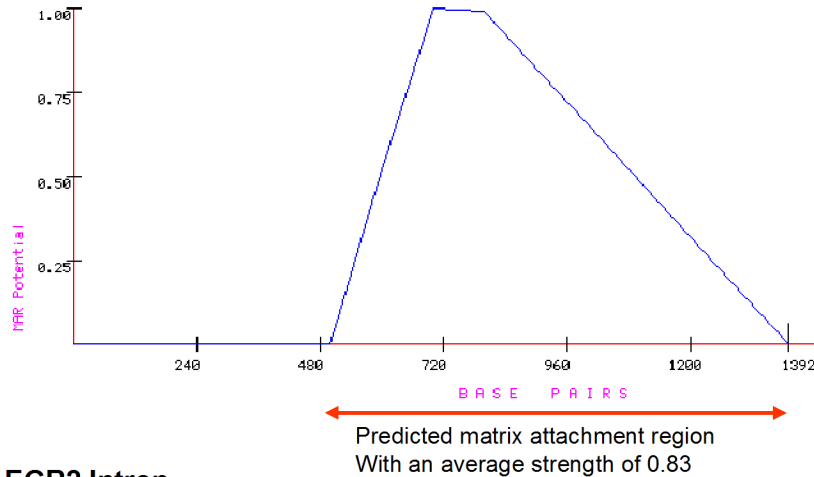

### EGR2 Intron

```

taagccgcgtgtcttcgcaggcccgacctgcgcggcccgaggtggtggatgggggtgca
gtgggtgtgcgggaatcgcaggagaggattggggctccaggtggacggtgctgactgcac
tggctttgaagactggaagtgggtgcaggaggaacctgcgacagctgagaccagggcgcg
cgggcagatgcccaggtcggcagcaaaccggcgtgctgcgccccggcgcgcccagccc
cgggcgagcgcaggatgggggtggaagaggcgtccccccgggtttcgaggcttgctag
gccctctggccggcagcacttcgacctccccctctcccggggcaggggcaaagtgcaggtg
aagtccggggctctcggggagagctgcgcgcctggagagccgagcggcggaagaagcgcca
ggggaaagcgtcggtagctccctcctgggcagagccgaccccgggaaaatctcggagcgc480
tcccttcttgcggcctggaggcgcgccccacctgcccgcccgccggaagttagaggggg
ttagtaaggcgggggctccggccggcggaggcagcagtggtggtggaggagggcgcg600
aacggcgggaagcagccccggactgccgagggaggcccgcgggggcaccgggcagcgcg
gtttccttgccgatgctgtggaagtctctctcgcggccccgcgcttctcagagcc720
gggccaactggccttgggctgaggcggggacgcgcggctgtcgggaaggcgggagaagatt
gggagggcacggaacctt [cggaactccttctctacatcccccattcgtccagcagcc
Ctcggctgaaggccagcgggagagggaggagaaaaaggcacaaggcgcggggatgggg900
agcagccgggaaatcaccaccccccttctcgggctctctctcgggtttggcaccat] cac
Ggcactgactgggataggtcgattcttgggtggtgtttgtcttgggtgcctcagccgtgga
Acccccaggcaaaaagagggagaaaagctccgggcggatgaggctttttaaaatattgt
Tgttgctattattgggtgtttttatggggactagagccacagatggctgggggtggag
Gggagttgggaaaagctcattctgcttttttggaggtagttcttgagttccatactgtca
Atgggttgccacagttgggctggcctcttcttacagctctgtgggcctcaatttcccacc
Ttttgactttgccacagctctacagtgctgagactctcggccttggaatggacctatg
Tgagcgggggtgagaaggagtcctggctgtattttcatgttccacctccattctgcct
tccccctcccag1391

```

**Matrix attachment region (predicted by MAR-Wiz)**

**CHIP primer sites**

**Relevant CpGs**

**A/T runs**

Supplementary Figure 2. EGR2 binding sites were predicted in two sites of interest: near the *MECP2* core promoter (A) and in an enhancer region 3' of the *MECP2* gene (B). EGR2 bound the site in the core promoter as shown by ChIP (see Figure 1) but did not bind the predicted site in the enhancer region (data not shown).

**A** *MECP2* core promoter (Liu and Francke, 2006)

tttttccggacggct**tttaccacagccctctctcc**gagaggagggagcgcgcgcgcc  
gcccagcggggaccccgcacggccgacgtcgcgccccgccctcttggccggccccgc  
gcgctgctgcacctg**cgcgccgcg**ccccgccctcggcgcgctcgcgagcccgccg  
tcattggctgtgatggccgggctgggacggggaggacgggggaggggggagggtctca  
gcgcgatgccgtca**attggcgagattcctgtcc**atttcggccagggaaggggg  
cggacccctccagctggtgattggctgctttcggccgctcgtttggggaaaagaggcg  
gcttgggcgcgaggaggactggtttagtgggcggaatttgaatgtaaggattaatgg  
acccttgcggatgctggggcaagtgaaggcctaggcttgggacgcctgtttgcgctg  
ctctgaggggagattgacctctgtccacagatgcaccgagtgcgctgcaataagcg  
ttcattgcacccacattttctcaatataactatcttcggcagaagcagcaaagttg  
cccaccctggagcctgacggttgcaccagctgaggggaccttggtttcagaggcctact  
caatgcattatttcatccgagcctgcccagtgctcacacttcatagaggcggggaa  
taaactgacaacaaatcgcaaccctggctttcgcagaactctggcgggggaagagag  
tgcattgccaaggcctcgtgacacctgtcactggttgatcagatggtttgggtggaggt  
gtgaataaggggcaatgtagctctgcctggaagatatgatttgggagctgagatcc  
agcaatttttactttcctagaagagttgatttggagctgagatccagcaattgtgt  
tttgggaaaataagagtatgagaaaactgtagtaaccagggtgttcaggacaggag  
tgtttgttaaggggaccttaccctgatgccagtcattatccaatccattcaatgatc  
cttctgttagttctatgcttagcaagaaaacctgattctgatttggctgcttgcc  
(antisense strand)

**B** *MECP2* enhancer S21 (Liu and Francke, 2006)

**Ctcggagattatcgccacctacca**cgttgactttgaaaggctgggtgggtgtctgtg  
accgtttttcgttccaggtctctcagcacctggtgacctccaggagcagggcctttc  
tcagcagccccgg**cgggggcg**ccttgggtg**gttgggtgggtgccccgcgc**

|                                                                |
|----------------------------------------------------------------|
| <p>Blue—primer sites<br/> Red—predicted Egr2 binding sites</p> |
|----------------------------------------------------------------|

Supplementary Figure 3. TESS predicted EGR2 binding sites in the *MECP2* promoter region (A) and an enhancer sequence in the *MECP2* 3' UTR identified by Liu and Francke, 2006 (B). The predicted EGR2 binding site located in the *MECP2* promoter region is highly conserved whereas the predicted site in the *MECP2* 3' UTR is not.

A

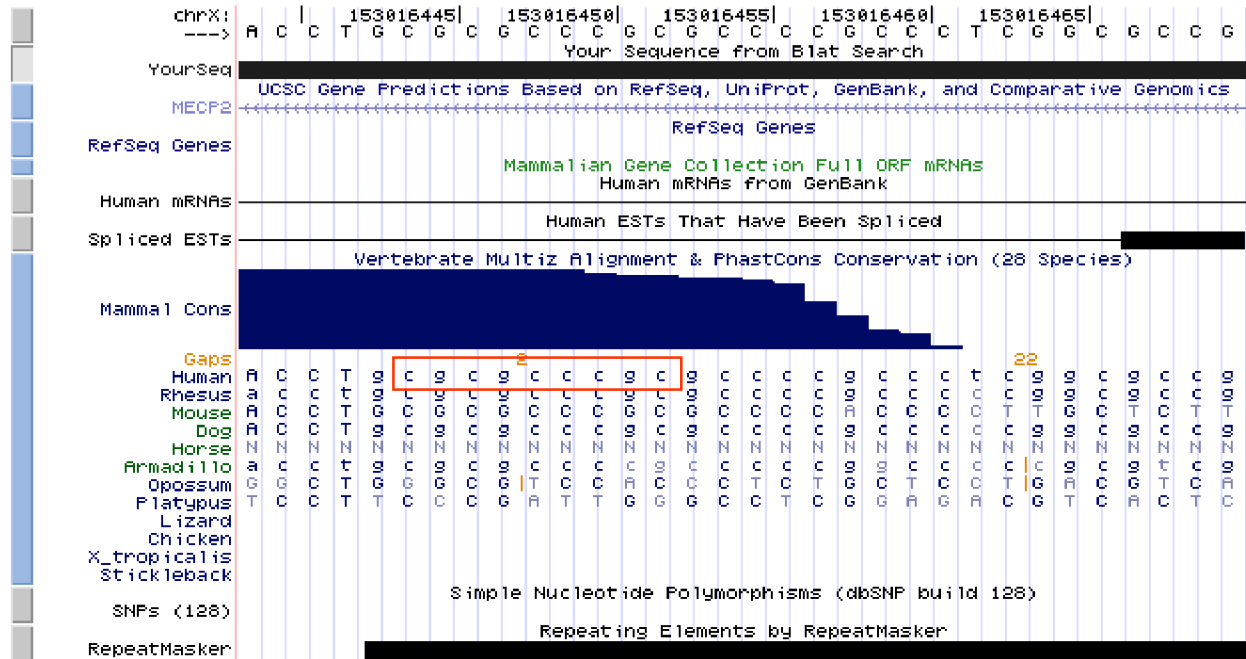

B

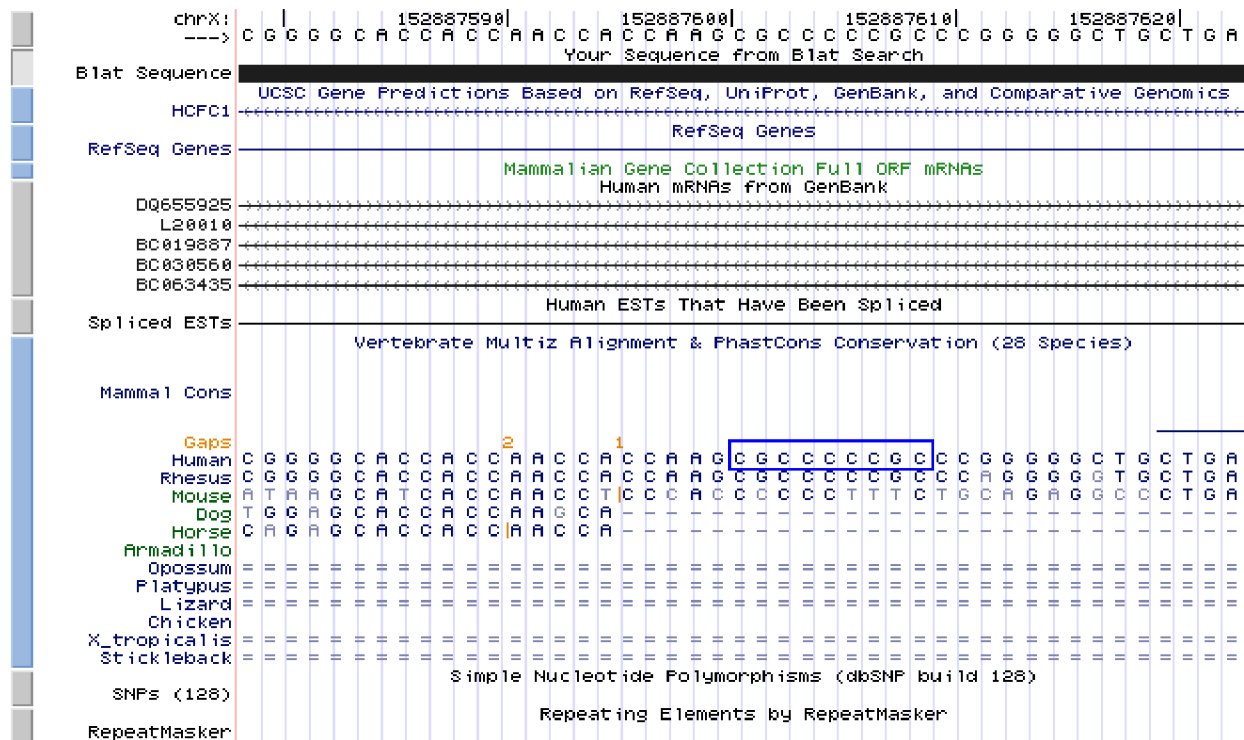

Supplementary Figure 4. Positive controls for known EGR2 and MeCP2 binding sites. A. *SNRPN* showed expected enrichment compared to the appropriate non-specific antibody control. B. Myelin Basic Protein (*MBP*) also showed enrichment compared to its non-specific antibody control.

***SNRPN* Fragment is Enriched in MeCP2 ChIP**

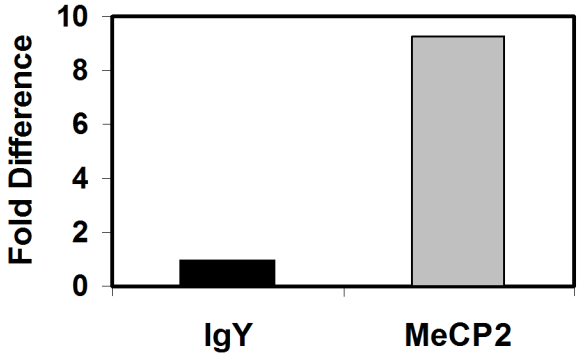

***MBP* Fragment is Enriched in EGR2 ChIP**

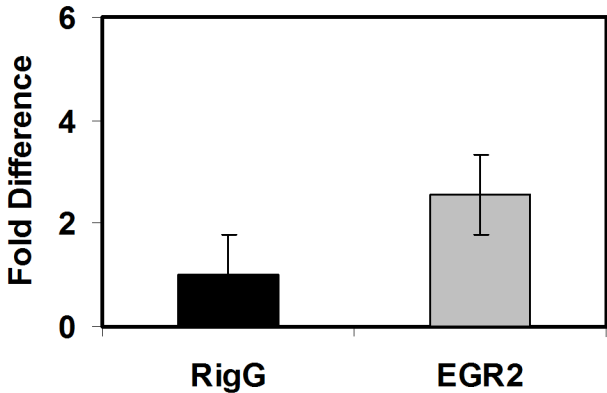

Supplementary Figure 5. EGR2 and MeCP2 protein expression in undifferentiated and differentiated SH-SY5Y cells. Treatment with PMA signals SH-SY5Y cells to differentiate and up-regulates MeCP2 and EGR2 protein. Blue: protein expression in undifferentiated control shows baseline levels of MeCP2 and EGR2. Green: protein expression 20 hours after PMA treatment show a slight but significant increase in MeCP2 and a larger >2-fold increase in EGR2. Red: 68 hours after PMA treatment, high levels of both MeCP2 and EGR2 are observed.

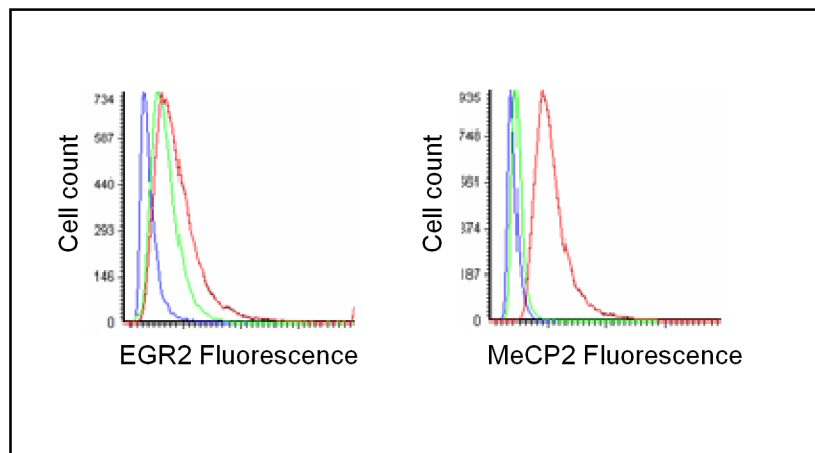

**Supplementary Figure 6.** Time course of *MECP2* and *EGR2* siRNA and assessment of transcript levels by qRT-PCR. A. SH-SY5Y human neuroblastoma cells were transfected with *EGR2* siRNA (grey bars or white bars) or control (black bars) then stimulated 4 hours later with PMA. Results are shown as the mean±SEM of a minimum of 3 replicates with the mean control normalized to 100%. **A.** 48 and 72 hr post-transfection *EGR2* protein levels were quantified by qRT-PCR demonstrating a specific reduction of *EGR2* at both time points. **B.** 48 and 72 hr post-transfection *MECP2* transcript levels were also quantified, demonstrating a reduction in *MECP2* for both time points. **C.** While some reduction in *MECP2* transcript was observed at 48 h, 72 h post-transfection *MECP2* levels were reduced to ~40% of control. **D.** Strong reductions in *EGR2* transcript levels were observed following *MECP2* siRNA knockdown at both 48 and 72 h time points.

**A**

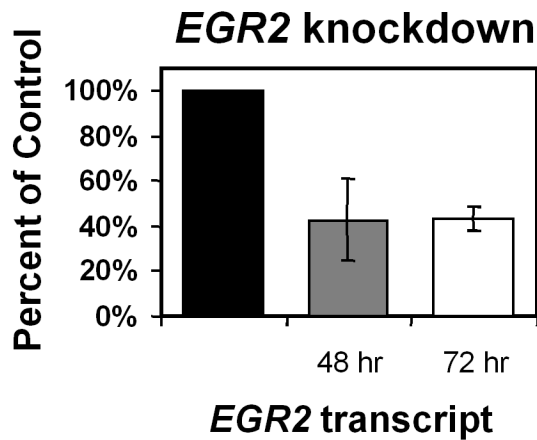

**B**

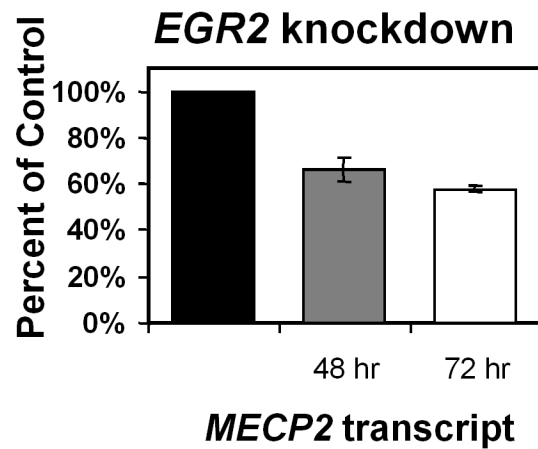

**C**

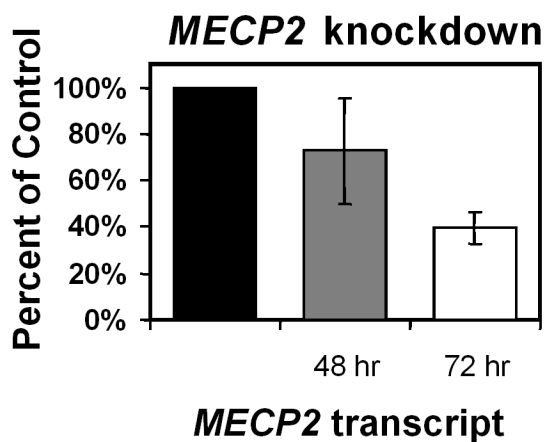

**D**

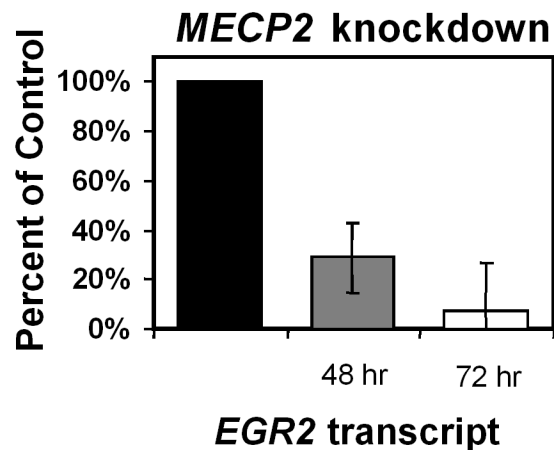

Supplementary Figure 7. *Egr2* expression is reduced in the *Mecp2*<sup>tm1Bird/y</sup> mouse brain compared to expression in the wildtype brain. A. Sagittal brain sections of four-week (P28) wild-type (*Mecp2*<sup>+/+</sup> or <sup>+/y</sup>) and MeCP2-null (*Mecp2*<sup>tm1Bird/y</sup>) littermates were stained using immunohistochemical techniques and scanned with the LSC. Histograms on the left side of each panel show MeCP2 staining in a wildtype female littermate (red outline) compared to background staining in four *Mecp2*<sup>tm1Bird/y</sup> littermates (green outline). The histograms on the right side of each panel show *Egr2* expression in the same *Mecp2*<sup>tm1Bird/y</sup> littermates (green outline) compared to the wildtype female littermate (red outline). Reduced *Egr2* expression was observed in the whole brain and specific regions including the medulla, the cerebellum and the pons. B. Sagittal brain sections from *Mecp2*-null (*Mecp2*<sup>tm1Bird/y</sup>) mice were also compared to non-littermate wildtype male mice. Bar graph showing statistically significant reduction of *Egr2* protein in the brain of a representative *Mecp2*-null male compared to a representative non-littermate wildtype male control ( $p < 0.001$ ). At least three replicates for each individual were used in the analyses. Cortex (CTX), hippocampus (HPCM), hindbrain (HB), olfactory bulb (OB), Anterior and posterior coliculi (APCOL), pons (PONS), thalamus (THAL), hypothalamus (HTHAL).

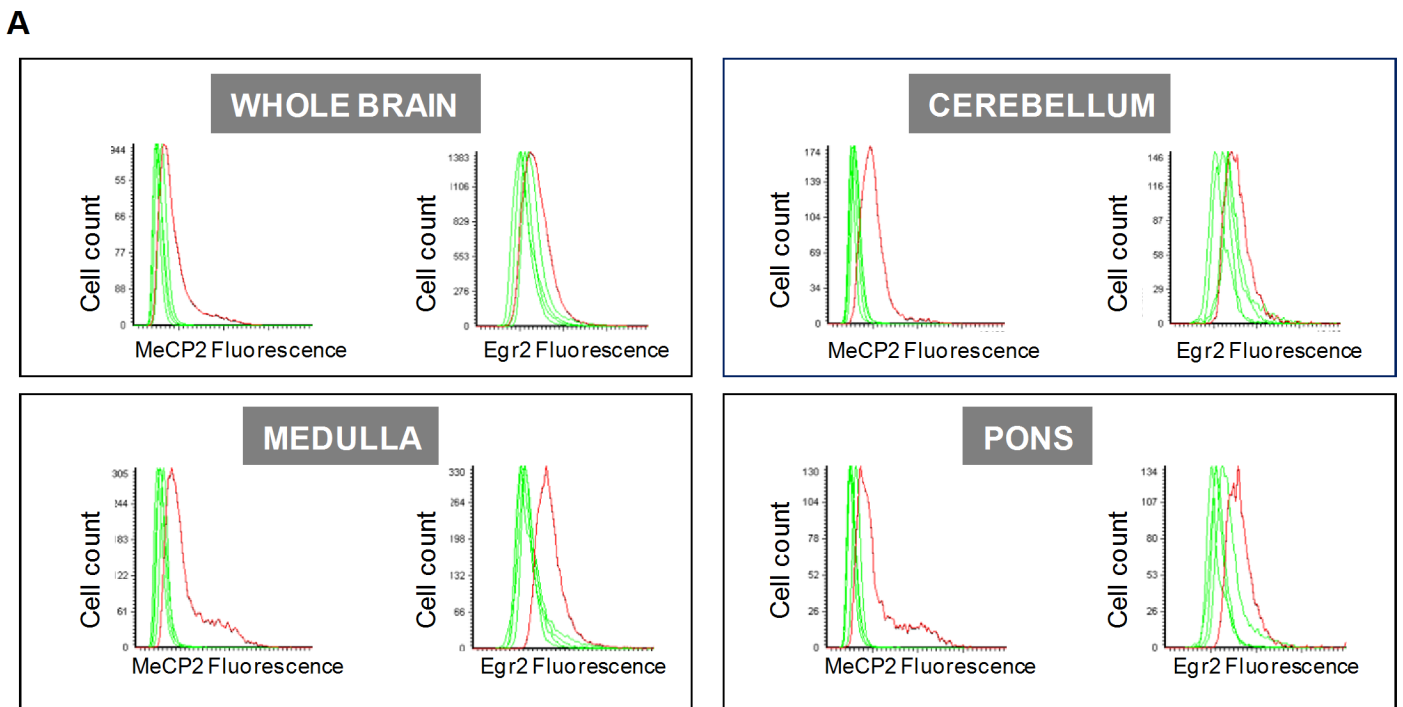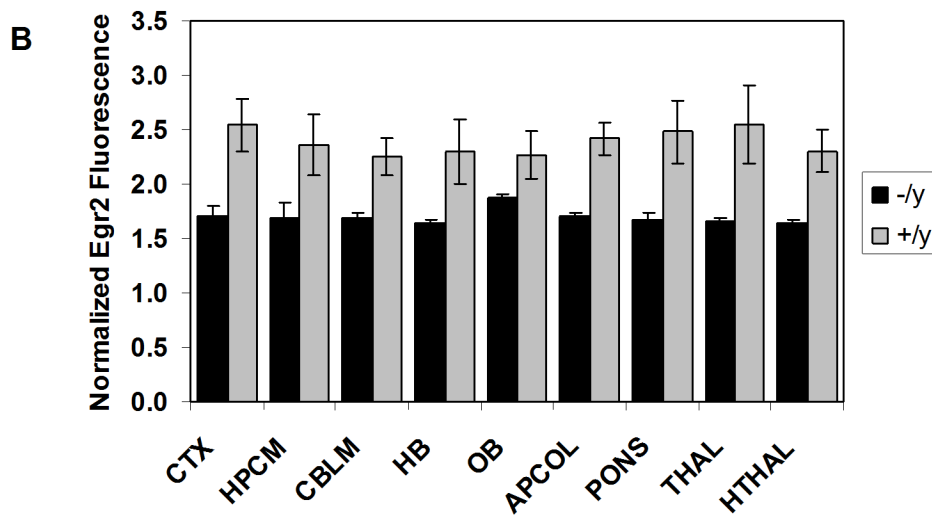

Supplementary Figure 8. A. Green EGR2 immunofluorescence in human cortical neurons counterstained with PI (red). B. LSC histogram showing fluorescence data from IgG staining control (black histogram) and EGR2 staining (red-outlined histogram). C. LSC scattergram of MeCP2 and EGR2 immunofluorescence showing a high correlation between MeCP2 and EGR2 levels in individual cells within the human cortex.

A

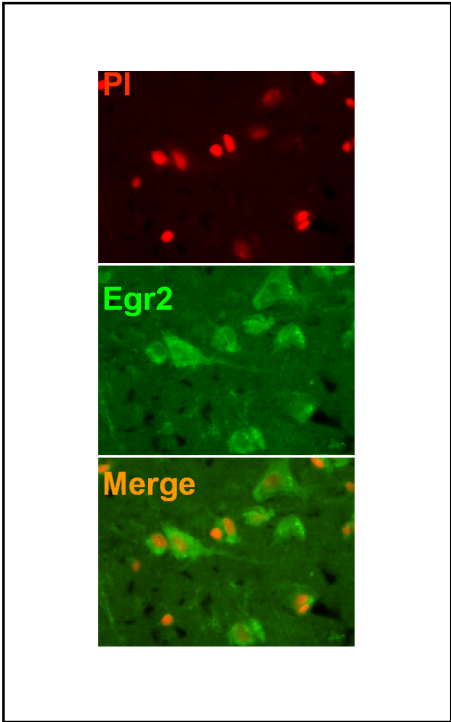

B

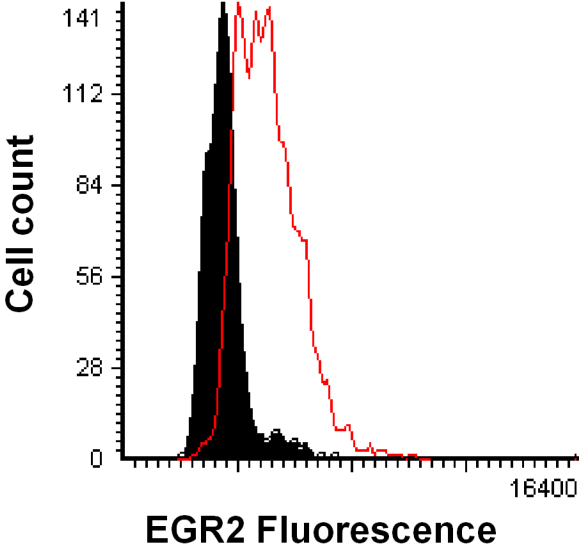

C

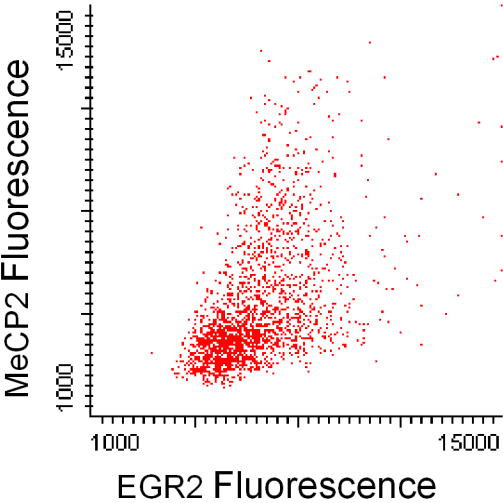



Supplemental Table 1. Analyses of MeCP2 and EGR2 in RTT and autism cortex (infant to adult) values normalized to control histone H1

| Phenotype                         | Sample ID | Age      | Sex | Normalized Egr2 <i>ab</i> | Normalized Mecp2 <i>ab</i> |
|-----------------------------------|-----------|----------|-----|---------------------------|----------------------------|
| <b>Early postnatal to 2 years</b> |           |          |     |                           |                            |
| typically developed               | 1157      | 20 days  | F   | 1.46 ± 0.03               | 1.56 ± 0.06                |
| typically developed               | 1321      | 62 days  | F   | 1.57 ± 0.06               | 1.39 ± 0.05                |
| typically developed               | 125       | 76 days  | M   | 1.50 ± 0.05               | 1.99 ± 0.12                |
| typically developed               | 1055      | 96 days  | M   | 1.16 ± 0.14               | .92 ± 0.09                 |
| typically developed               | 135       | 120 days | M   | 1.67 ± 0.05               | 1.57 ± 0.08                |
| typically developed               | 1257      | 2 y      | F   | 1.52 ± 0.06               | 1.56 ± 0.09                |
| <b>mean (n=6)</b>                 |           |          |     | <b>1.48 ± 0.07</b>        | <b>1.50 ± 0.14</b>         |
| <b>Childhood to adult</b>         |           |          |     |                           |                            |
| typically developed               | 229       | 4 y      | M   | 2.05 ± 0.02               | 1.34 ± 0.06                |
| typically developed               | 1377      | 6 y      | F   | 1.75 ± 0.03               | 1.51 ± 0.10                |
| typically developed               | 3835      | 9 y      | F   | 1.68 ± 0.05               | 1.53 ± 0.08                |
| typically developed               | 662       | 12 y     | F   | 2.03 ± 0.06               | 1.73 ± 0.06                |
| typically developed               | 1065      | 15 y     | M   | 1.82 ± 0.04               | 1.47 ± 0.09                |
| typically developed               | 812       | 18 y     | F   | 1.86 ± 0.04               | 1.66 ± 0.11                |
| typically developed               | 1027      | 22 y     | M   | 1.89 ± 0.03               | 1.54 ± 0.09                |
| typically developed               | 602       | 27 y     | M   | 1.77 ± 0.04               | 1.35 ± 0.05                |
| typically developed               | 1029      | 29 y     | M   | 1.82 ± 0.03               | 1.62 ± 0.05                |
| typically developed               | 1136      | 33 y     | F   | 1.94 ± 0.06               | 1.76 ± 0.13                |
| typically developed               | 1104      | 35 y     | M   | 2.07 ± 0.07               | 1.63 ± 0.05                |
| typically developed               | 1406      | 38 y     | F   | 1.93 ± 0.05               | 1.57 ± 0.09                |
| typically developed               | 1135      | 42 y     | M   | 2.05 ± 0.04               | 1.61 ± 0.05                |
| <b>mean (n=13)</b>                |           |          |     | <b>1.90 ± 0.03</b>        | <b>1.52 ± 0.04</b>         |

| Phenotype                         | Sample ID | Age  | Sex | Normalized Egr2 <i>ab</i> | Normalized Mecp2 <i>ab</i> |
|-----------------------------------|-----------|------|-----|---------------------------|----------------------------|
| <b>Early postnatal to 2 years</b> |           |      |     |                           |                            |
| RTT                               | 1238      | 1 y  | M   | 1.58 ± 0.04               | 1.13 ± 0.04                |
| <b>Childhood to adult</b>         |           |      |     |                           |                            |
| RTT                               | B4687     | 8 y  | F   | 1.75 ± 0.02*              | 1.15 ± 0.02***             |
| RTT                               | B5214     | 10 y | F   | 1.60 ± 0.06***            | 1.16 ± 0.06***             |
| RTT                               | 1815      | 18 y | F   | 1.78 ± 0.06               | 1.31 ± 0.03***             |
| RTT                               | B5075     | 20y  | F   | 1.54 ± 0.06***            | 1.11 ± 0.06***             |
| RTT                               | 1420      | 21 y | F   | 1.78 ± 0.06               | 1.35 ± 0.06*               |
| RTT                               | 1748      | 22 y | F   | 1.85 ± 0.04               | 1.08 ± 0.02***             |
| RTT                               | 3381      | 22 y | F   | 1.88 ± 0.02               | 1.35 ± 0.02***             |
| RTT                               | 4321      | 23 y | F   | 1.79 ± 0.05               | 1.53 ± 0.05                |
| RTT                               | 4312      | 24 y | F   | 1.53 ± 0.06**             | 1.13 ± 0.06***             |
| RTT                               | B5020     | 24 y | F   | 1.46 ± 0.05***            | 1.00 ± 0.05***             |
| <b>mean (n=10)</b>                |           |      |     | <b>1.68 ± 0.04**</b>      | <b>1.21 ± 0.05***</b>      |
| autism                            | 3871      | 5 y  | M   | 1.68 ± 0.06*              | 1.47 ± 0.06                |
| autism                            | 1174      | 7 y  | F   | 1.55 ± 0.14**             | 1.31 ± 0.14                |
| autism                            | B4925     | 9 y  | M   | 1.57 ± 0.05**             | 1.17 ± 0.005***            |
| autism                            | 797       | 9y   | M   | 1.58 ± 0.04**             | 1.38 ± 0.04***             |
| autism                            | 1182      | 9y   | F   | 1.59 ± 0.02               | 1.51 ± 0.02                |
| autism                            | B5342     | 11 y | F   | 1.57 ± 0.05**             | 1.23 ± 0.05***             |
| autism (suspected)                | 732       | 15 y | M   | 1.68 ± 0.03*              | 1.35 ± 0.03***             |
| autism                            | 3924      | 16 y | F   | 1.86 ± 0.03               | 1.48 ± 0.03*               |
| autism                            | 1638      | 20y  | F   | 1.87 ± 0.03               | 1.31 ± 0.03***             |
| autism                            | B5144     | 20y  | M   | 1.80 ± 0.04               | 1.09 ± 0.04***             |
| autism                            | B5000     | 27y  | M   | 1.70 ± 0.02               | 1.42 ± 0.02**              |
| autism                            | B5173     | 30y  | M   | 1.72 ± 0.07               | 1.54 ± 0.07                |
| autism (suspected)                | 967       | 32y  | M   | 1.55 ± 0.05*              | 1.54 ± 0.05*               |
| <b>mean (n=13)</b>                |           |      |     | <b>1.67 ± 0.03***</b>     | <b>1.37 ± 0.04***</b>      |

| <b>Group comparisons by t-test<br/>(Childhood to adult samples)</b> | <b>Egr2</b>           | <b>Mecp2</b>         |
|---------------------------------------------------------------------|-----------------------|----------------------|
| <b>TD/RTT</b>                                                       | <b>p &lt; 0.005</b>   | <b>P &lt; 0.0001</b> |
| <b>TD/Aut</b>                                                       | <b>p &lt; 0.00005</b> | <b>p &lt; 0.05</b>   |

**Comparison to three closest  
age-matched controls by t-test**

**\* p ≤ 0.05**

**\*\* p ≤ 0.01**

**\*\*\* p ≤ 0.001**

Supplementary Table 2-Sequences of Dharmacon®  
siRNA Oligos

|         | <i>MECP2</i> siRNA    |
|---------|-----------------------|
| oligo 1 | GGAAAGGACUGAAGACCUG   |
| oligo 2 | ACACAUCCUGGACCCUAA    |
| oligo 3 | GCUCUAAAGUGGAGUUGAU   |
| oligo 4 | GCAGAAACCACCUAAGAAG   |
|         | <i>EGR2</i> siRNA     |
| oligo 1 | GAAGGCAUAAUCAAUUUG    |
| oligo 2 | CUACUGUGGCCGAAAGUUU   |
| oligo 3 | GAAACCAGACCUUCACUUA   |
| oligo 4 | GAGAAGAGGUCGUUGGAUC   |
|         | Non-targeting Control |
| oligo 1 | UGGUUUACAUGUCGACUUA   |
| oligo 2 | UGGUUUACAUGUUGUGUG    |
| oligo 3 | UGGUUUACAUGUUUUCUGA   |
| oligo 4 | UGGUUUACAUGUUUCCUA    |

Supplementary Table 3—Primers for ChIP and Q-PCR

|                                   |                          |
|-----------------------------------|--------------------------|
| <i>EGR2</i> intron                |                          |
| forward (5'-3')                   | atggtgccaacccgagag       |
| reverse (5'-3')                   | cggactccttcctctacatcc    |
|                                   |                          |
| <i>MECP2</i> promoter region      |                          |
| forward (5'-3')                   | ttaccacagccctctctcc      |
| reverse (5'-3')                   | ggacaggaaatctcgccaat     |
|                                   |                          |
| <i>MECP2</i> Enhancer             |                          |
| forward (5'-3')                   | ctcggagattatcgccacctacca |
| reverse (5'-3')                   | ggcgcggggcaccaccaac      |
|                                   |                          |
| <i>MBP</i> (Myelin Basic Protein) |                          |
| forward (5'-3')                   | tggtcgccacttagcctatgt    |
| reverse (5'-3')                   | cagaaggccctgcatttcag     |
|                                   |                          |
| <i>GAPDH</i>                      |                          |
| forward (5'-3')                   | catgggtggaatcatattgga    |
| reverse (5'-3')                   | gagtcaacggatttgggtcgt    |
|                                   |                          |
| <i>SNRPN</i>                      |                          |
| forward (5'-3')                   | tcggtatttagggggtgtg      |
| reverse (5'-3')                   | tcggtcactgcgacgaat       |
|                                   |                          |
